# Supplementary material for: Gravitational separation of Ar/N 2 and age of air in the lowermost stratosphere in airborne observations and a chemical transport model
Source: Copernicus journal article supplement (doi:10.5194/acp-2020-95), 2020-02-24
Supplement: Supplementary file 1 [file acp-2020-95-supplement.zip]

Archive with 2 entries (2 files):
- dArN2_and_AOA_alt_zonalMean.avi
- paper_draft_SI_formated_submitted.pdf
