# Supplementary material for: Gravitational separation of Ar/N 2 and age of air in the lowermost stratosphere in airborne observations and a chemical transport model
Source: Copernicus journal article supplement (doi:10.5194/acp-2020-95), 2020-02-24
Supplement: Supplementary file 1 [file acp-2020-95-supplement.zip › paper_draft_SI_formated_submitted.pdf]

# Supplementary information to: Gravitational separation of Ar/N<sub>2</sub> and age of air in the lowermost stratosphere in airborne observations and a chemical transport model

Benjamin Birner<sup>1</sup>, Martyn P. Chipperfield<sup>2,3</sup>, Eric J. Morgan<sup>1</sup>, Britton B. Stephens<sup>4</sup>, Marianna Linz<sup>5</sup>,  
 5 Wuhu Feng<sup>2,6</sup>, Chris Wilson<sup>2,3</sup>, Jonathan D. Bent<sup>1,7</sup>, Steven C. Wofsy<sup>5</sup>, Jeffrey Severinghaus<sup>1</sup>, Ralph F. Keeling<sup>1</sup>

<sup>1</sup>Scripps Institution of Oceanography, UC San Diego, La Jolla, CA 92093, USA

<sup>2</sup>School of Earth and Environment, University of Leeds, Leeds, LS2 9JT, UK

<sup>3</sup>National Centre for Earth Observation, University of Leeds, Leeds, LS2 9JT, UK

10 <sup>4</sup>National Center for Atmospheric Research, Boulder, CO 80301, USA

<sup>5</sup>Department of Earth and Planetary Sciences, and School of Engineering and Applied Sciences, Harvard University, Cambridge, MA 02138, USA

<sup>6</sup>National Centre for Atmospheric Science, University of Leeds, Leeds, LS2 9JT, UK

<sup>7</sup>now at: Picarro, Inc., Santa Clara, CA 95054, USA

15 *Correspondence to:* Benjamin Birner (bbirner@ucsd.edu)

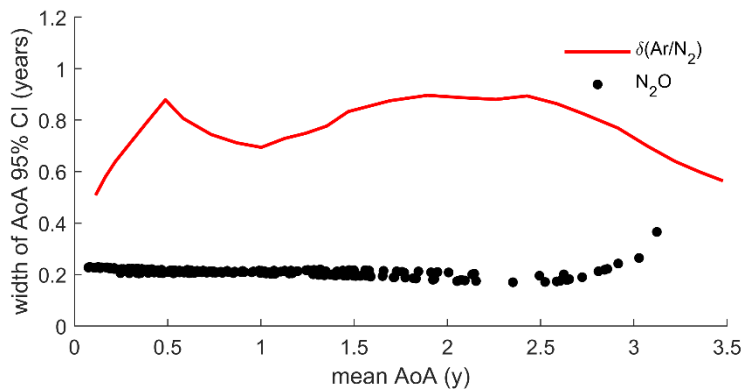

**Figure S1.** Width of the 95% confidence interval for AoA estimates from N<sub>2</sub>O based on the Markov chain Monte Carlo algorithm (points, see methods) and from  $\delta(\text{Ar}/\text{N}_2)$  using the AoA- $\delta(\text{Ar}/\text{N}_2)$  relationship in TOMCAT (red line).

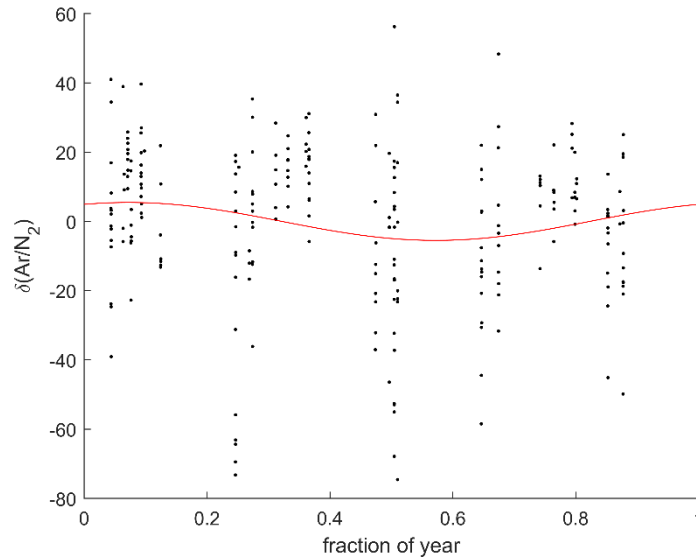

**Figure S2. Seasonal cycle of  $\delta(\text{Ar}/\text{N}_2)$  in the tropical upper troposphere ( $20^\circ > \text{lat} > -20^\circ$  & altitude  $> 6$  km).**

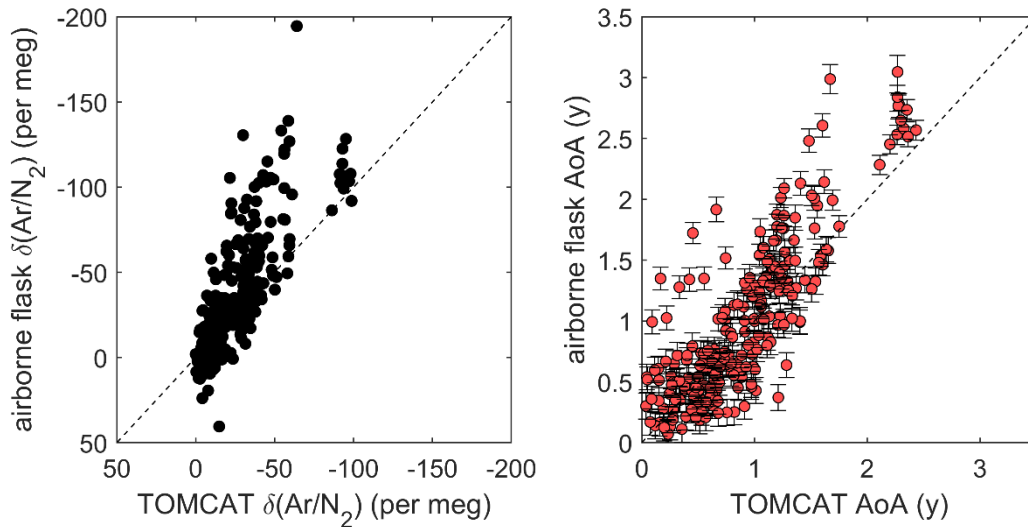

**Figure S3. Comparison of AoA and  $\delta(\text{Ar}/\text{N}_2)$  in TOMCAT to the airborne campaign data in the lowermost stratosphere. TOMCAT grid cells are chosen to be closest in space in time to the observations, but unresolved mixing processes sometimes can allow more fractionated/older air to be present in the observations than can be reproduced by TOMCAT. Note that these deviations will partially cancel when evaluating the AoA-GS relationship.**

25

30
